# Supplementary material for: Oral 8-aminoguanine against age-related retinal degeneration
Source: Springer Nature journal article supplement (doi:10.1038/s42003-025-08242-1), 2025-05-26

MDA staining for Figure 3A-E

# Secondary only control

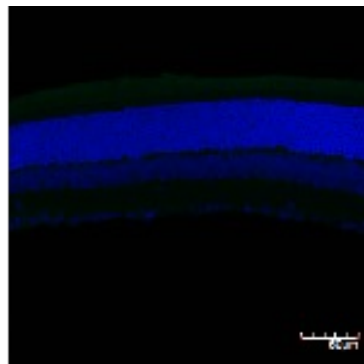

Secondary  
only control

# Young F344 rat retinae (Biol. repeat 1-3)

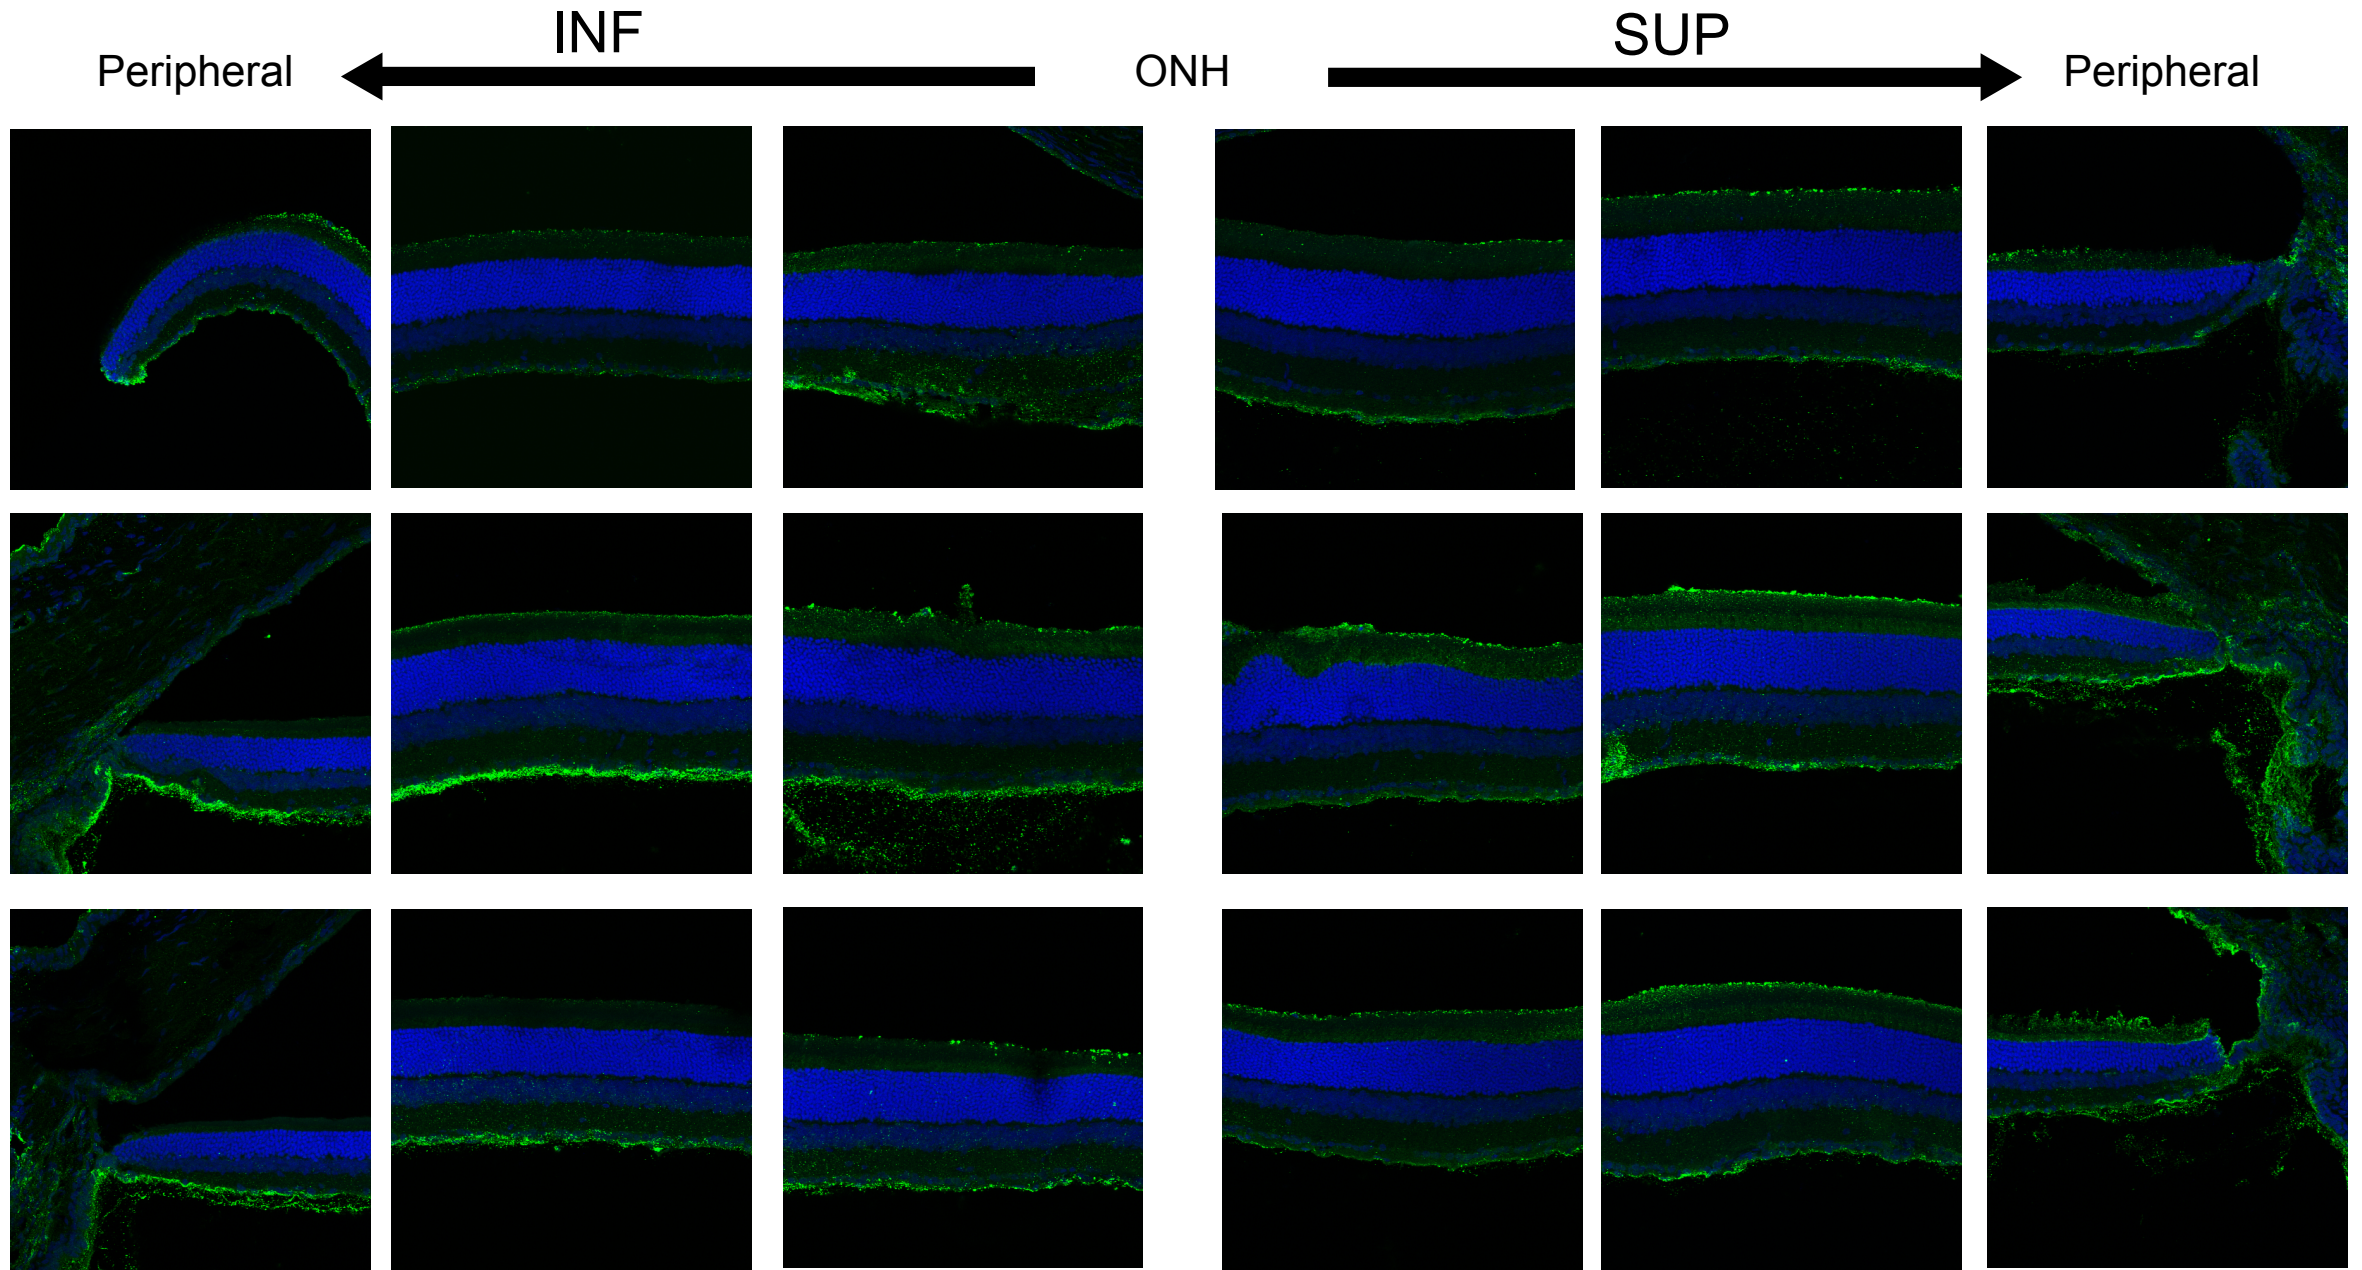



# Aged water-treated F344 rat retinae (Biol. Repeat 1-3)

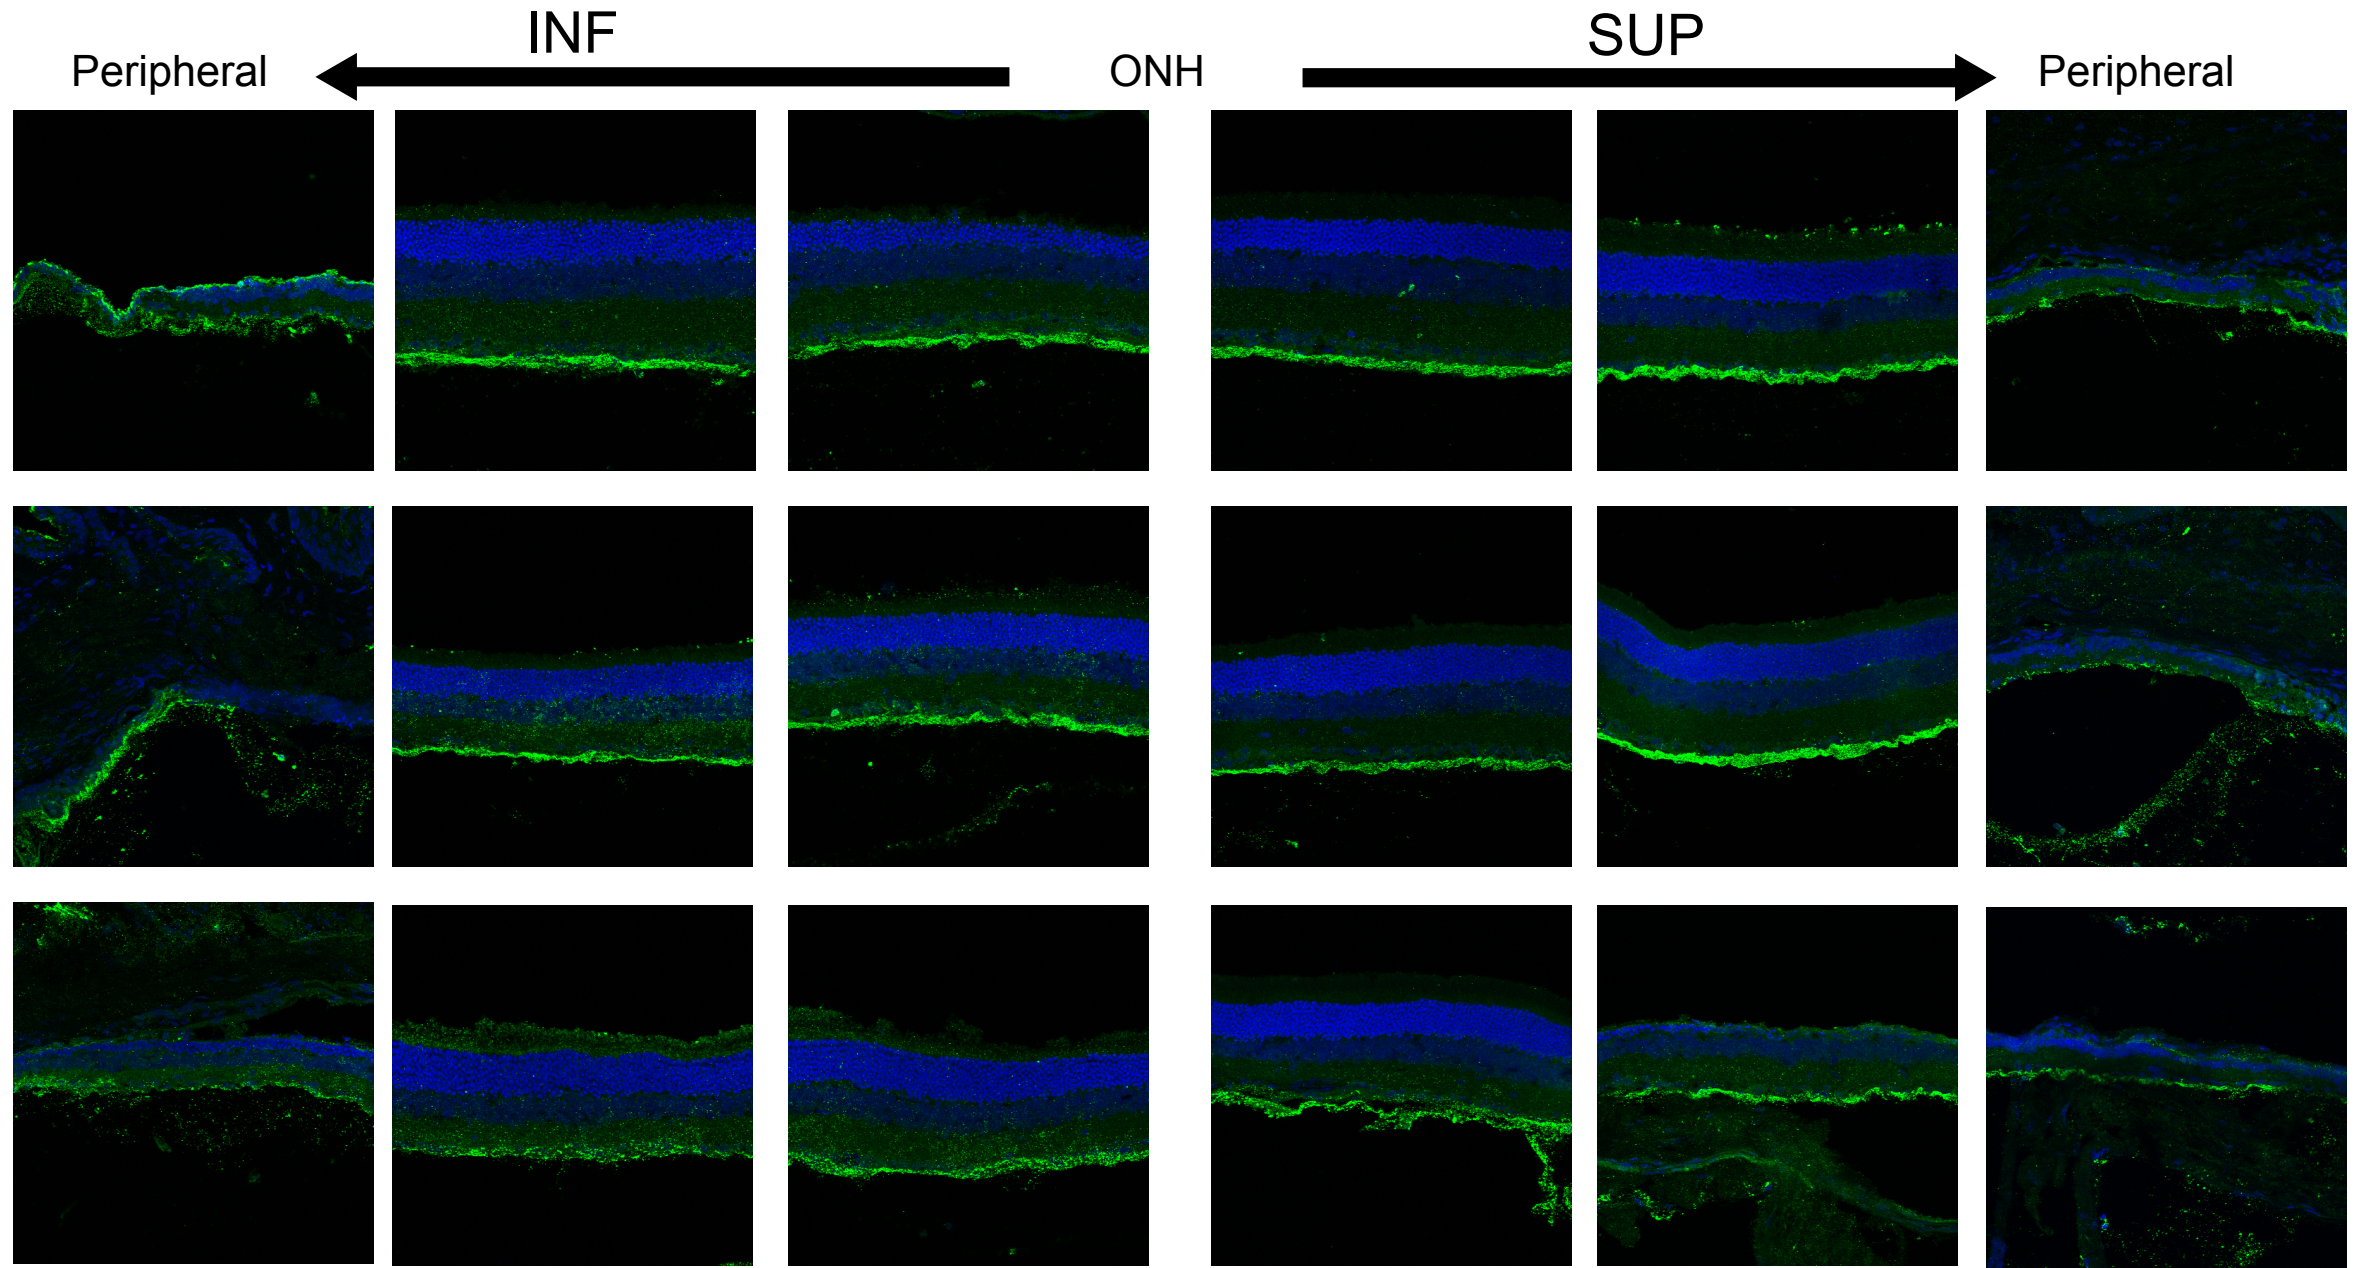



# Aged 8AG-treated F344 rat retinae (Biol. Repeat 1-3)

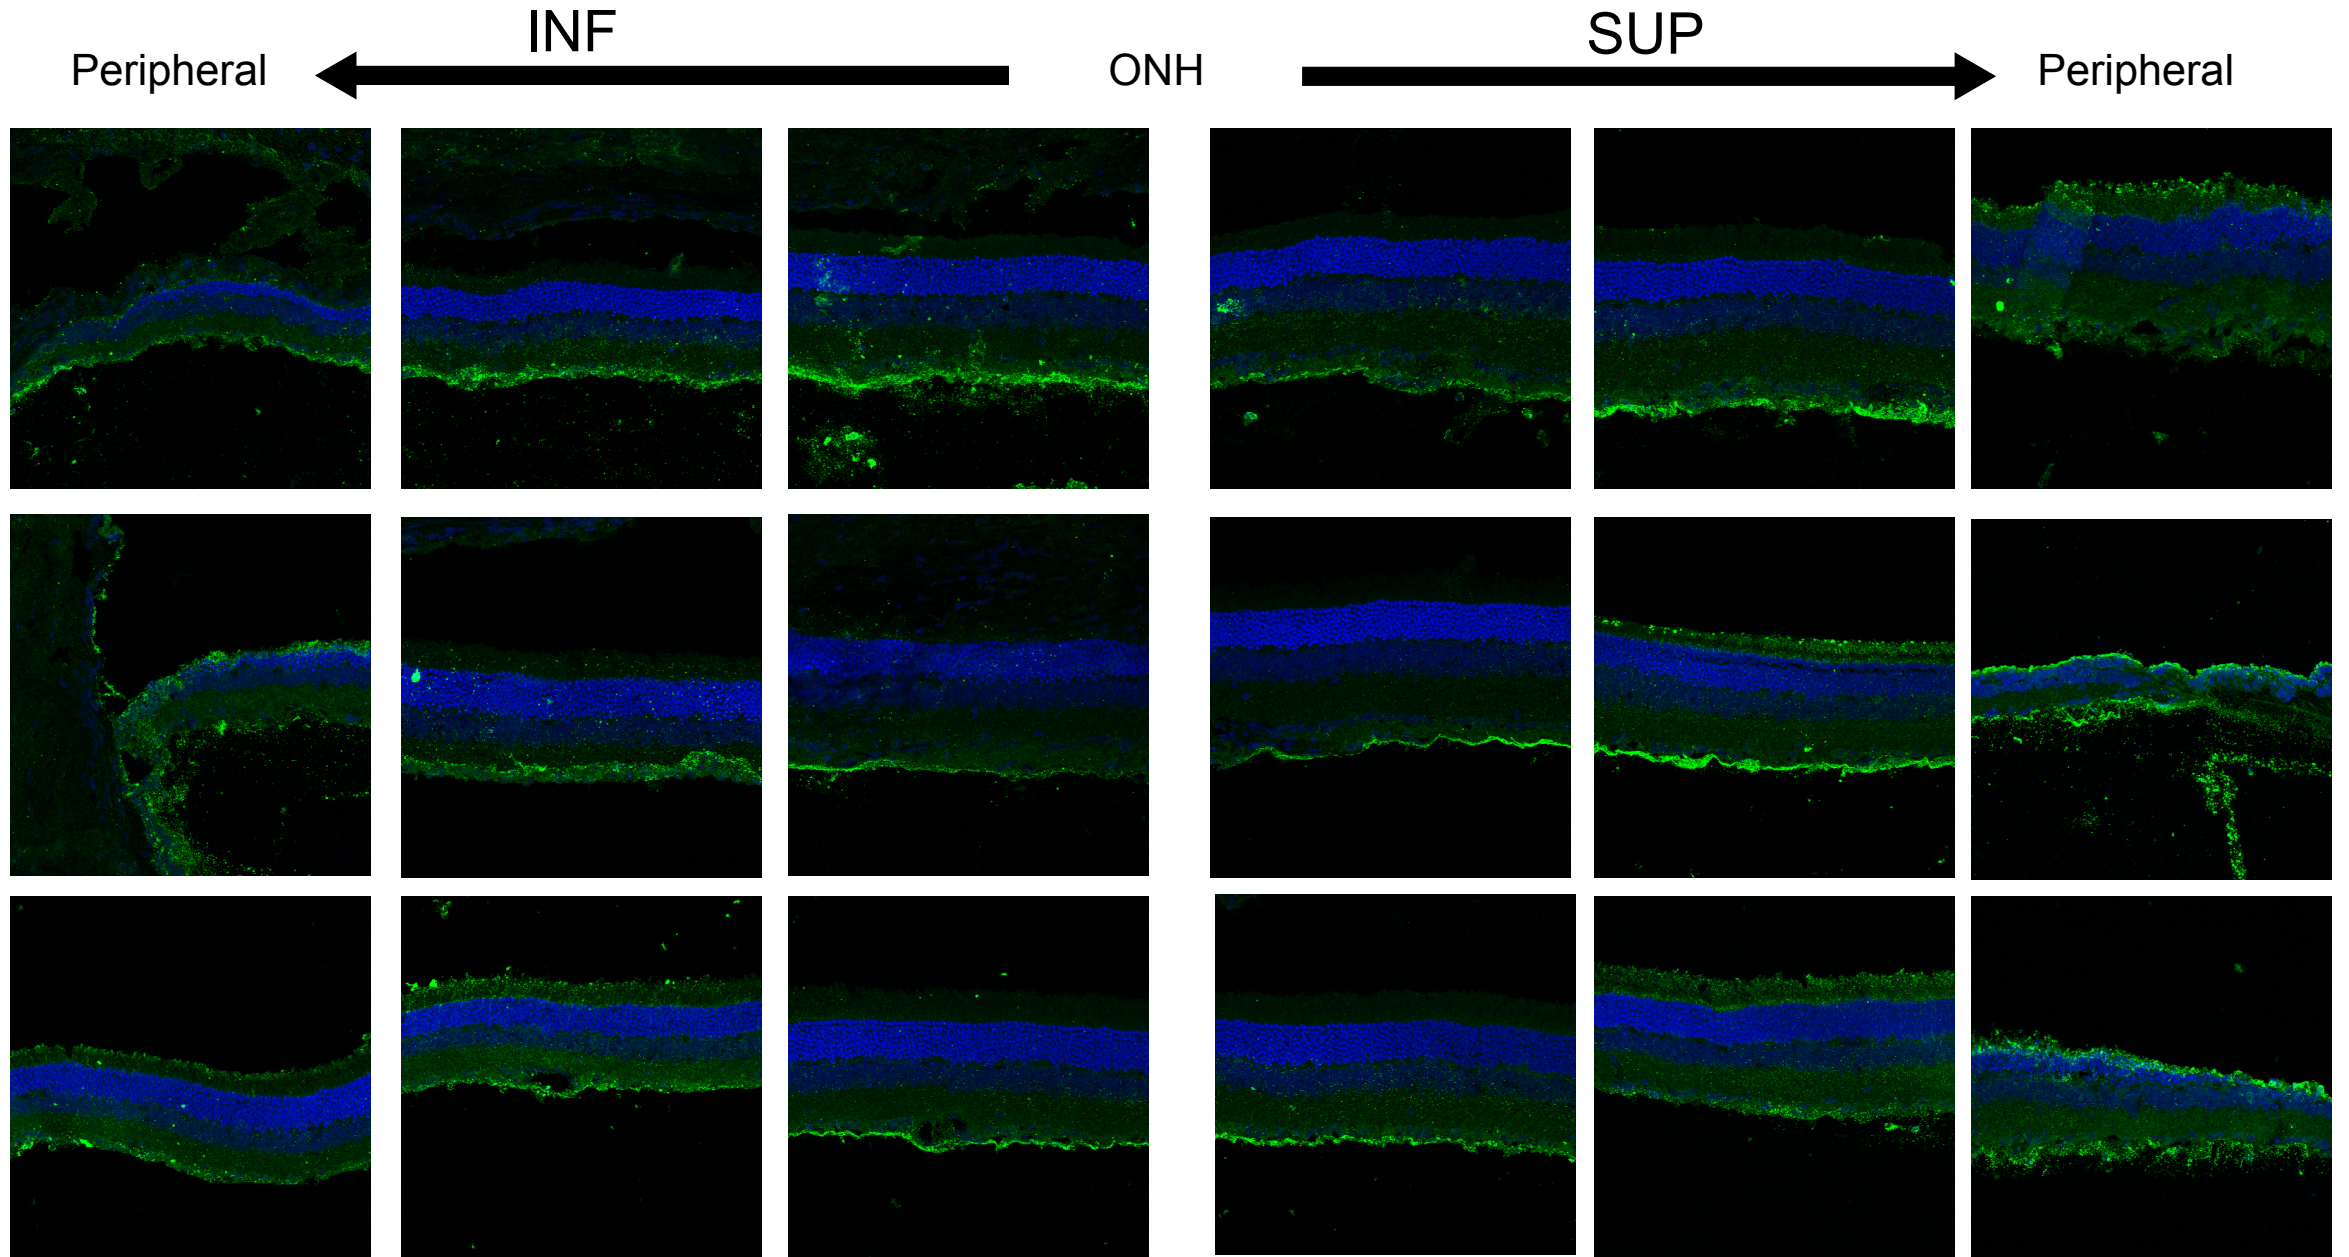

Supplement: MOESM10 [file 42003_2025_8242_MOESM10_ESM.pdf]
